# Supplementary material for: Chemical modification improves the stability of the DNA aptamer GBI-10 and its affinity towards tenascin-C
Source: Royal Society of Chemistry journal article supplement (doi:10.1039/c6ob02577c), 2016-12-24
Supplement: c6ob02577c1.pdf [file c6ob02577c1.pdf]

## Chemical modification improves stability and targeting function of DNA aptamer GBI-10 targeted Tenascin-C

### Supporting Information

Kunfeng Li,<sup>#</sup> Jiali Deng,<sup>#</sup> Hongwei Jin, Xiantao Yang, Ximeng Fan, Liyu Li, Yi Zhao, Zhu  
Guan,<sup>\*</sup> Lihe Zhang, Zhenjun Yang<sup>\*</sup>

*State Key Laboratory of Natural and Biomimetic Drugs, School of Pharmaceutical Sciences, Peking  
University, Beijing 100191, PR China.*

\*To whom correspondence should be addressed. Tel & Fax: 86-10-82802503; Email: [yangzj@bjmu.edu.cn](mailto:yangzj@bjmu.edu.cn)  
(Prof. Z. J. Yang) and Tel & Fax: 86-10-82805023; [guanzhu\\_gz@bjmu.edu.cn](mailto:guanzhu_gz@bjmu.edu.cn) (Dr. Z. Guan)

<sup>#</sup>These authors contributed equally to this paper.

## Table of Contents

**Figure S1.** The separation results of biotin labeled GBI-10 variants with HPLC. Dionex UltiMate 3000 HPLC, XBridge™ OST C18 column (2.5 μm, 10 mm × 50 mm), Gradient program: 15-35% eluent A in 35 min (A: 0.1M Et<sub>3</sub>N-CH<sub>3</sub>COOH in water, pH = 7.7; B: CH<sub>3</sub>CN), column temperature 40 °C.

**Figure S2.** MALDI-TOF-MS of biotin labeled GBI-10

**Figure S3.** MALDI-TOF-MS of biotin labeled GBI-10-15T<sub>D</sub>

**Figure S4.** MALDI-TOF-MS of biotin labeled GBI-10-3C<sub>D</sub>

**Figure S5.** MALDI-TOF-MS of biotin labeled GBI-10-10A<sub>L</sub>

**Figure S6.** MALDI-TOF-MS of biotin labeled GBI-10-18A<sub>L</sub>

**Figure S7.** MALDI-TOF-MS of biotin labeled GBI-10-21T<sub>D</sub>

**Figure S8.** MALDI-TOF-MS of biotin labeled GBI-10-23C<sub>L</sub>

**Figure S9.** MALDI-TOF-MS of biotin labeled GBI-10-22T<sub>D</sub>

**Figure S10.** MALDI-TOF-MS of biotin labeled GBI-10-33C<sub>L</sub>

**Figure S11.** MALDI-TOF-MS of biotin labeled GBI-10-26T<sub>L</sub>/32T<sub>L</sub>

**Figure S12.** MALDI-TOF-MS of biotin labeled GBI-10-4A<sub>L</sub>/26T<sub>L</sub>/32T<sub>L</sub>

**Table S1.** Biotin labeled GBI-10 and 2'-dI, D/L-isoNA modified variants.

### The synthesis of the biotin labeled GBI-10 variants

Natural GBI-10 and D-/L-isoT modified GBI-10 were synthesized on ABI 394 automated DNA synthesizer (isoT phosphoramidite monomers and isoT-modified oligonucleotides were synthesized by our lab according to the literature<sup>1, 2</sup> using standard phosphoramidite chemistry). All the GBI-10 variants were purified by C18 reverse high performance liquid chromatography (XBridge™ OST C18, 2.5 μm, 10 mm × 50 mm) using a linear gradient of 15→35% eluent A in 35 min. Solutions of 0.1 M Et<sub>3</sub>N-CH<sub>3</sub>COOH in water, pH 7.7, were used as eluent B, and CH<sub>3</sub>CN was used as eluent A. Then the isolated DMT-on oligonucleotides were treated with 80% acetic acid for 10 min at room temperature. After neutralization with Et<sub>3</sub>N, the oligonucleotide solutions were desalted by Sephadex G25 column respectively. The oligonucleotide compositions were confirmed by MALDI-TOF-MS spectrometry.

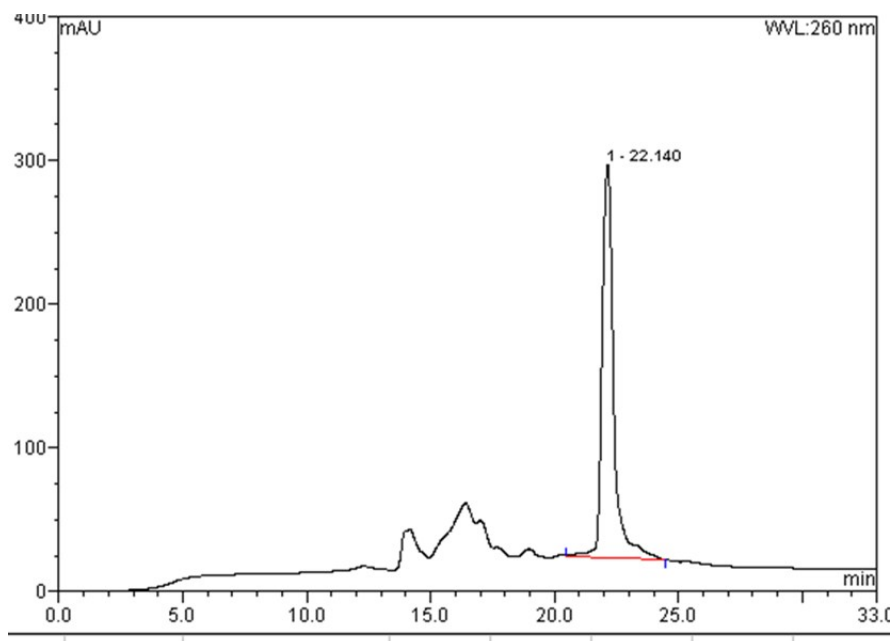

**Figure S1.** The separation results of biotin labeled GBI-10 with HPLC

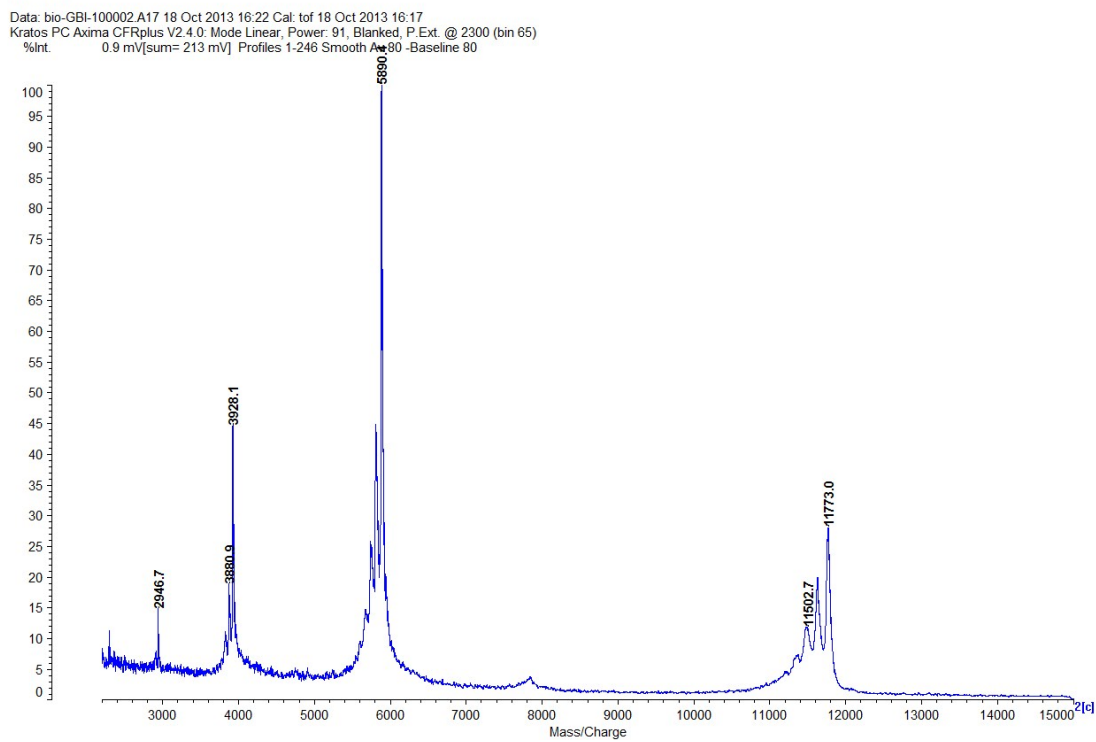

**Figure S2.** MALDI-TOF-MS of biotin labeled GBI-10

Data: G-13TD0001.K7 22 Nov 2013 17:11 Cal: tof 22 Nov 2013 17:10  
Kratos PC Axima CFRplus V2.4.0: Mode Linear, Power: 95, Blanked, P.Ext. @ 11777 (bin 148)  
%Int. 3.7 mV[sum= 596 mV] Profiles 15-176 Smooth Av 50 -Baseline 80

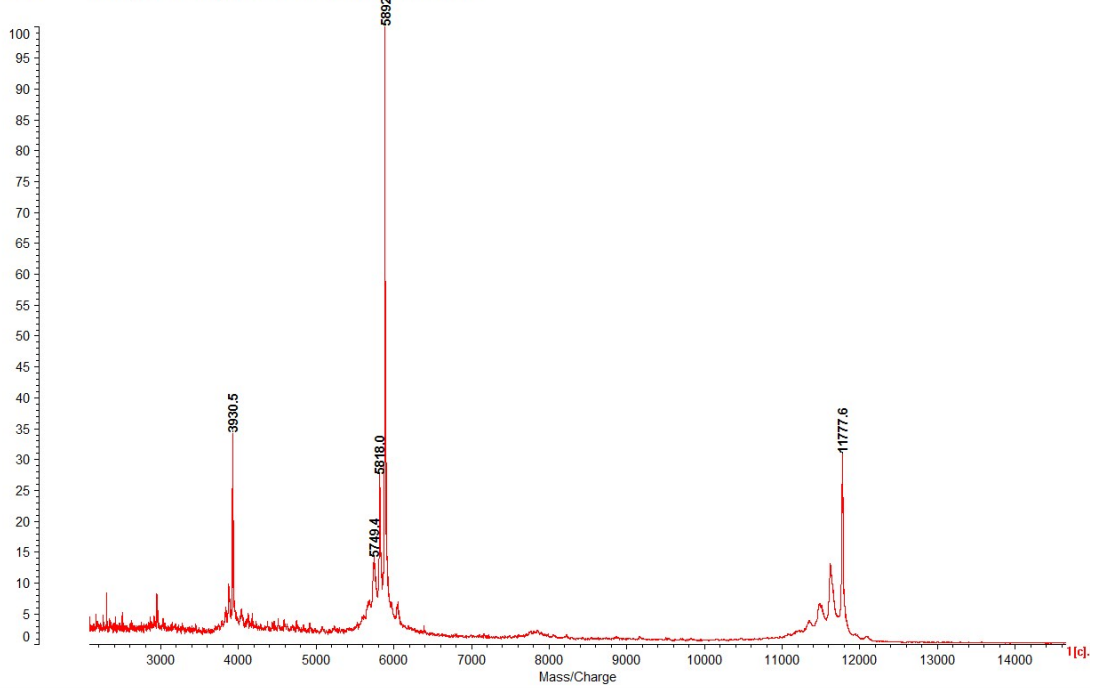

Figure S3. MALDI-TOF-MS of biotin labeled GBI-10-15TD

Data: G-3TD0001.L8 22 Nov 2013 19:31 Cal: tof 22 Nov 2013 19:31  
Kratos PC Axima CFRplus V2.4.0: Mode Linear, Power: 95, Blanked, P.Ext. @ 11777 (bin 148)  
%Int. 3.9 mV[sum= 817 mV] Profiles 1-210 Smooth Av 50 -Baseline 80

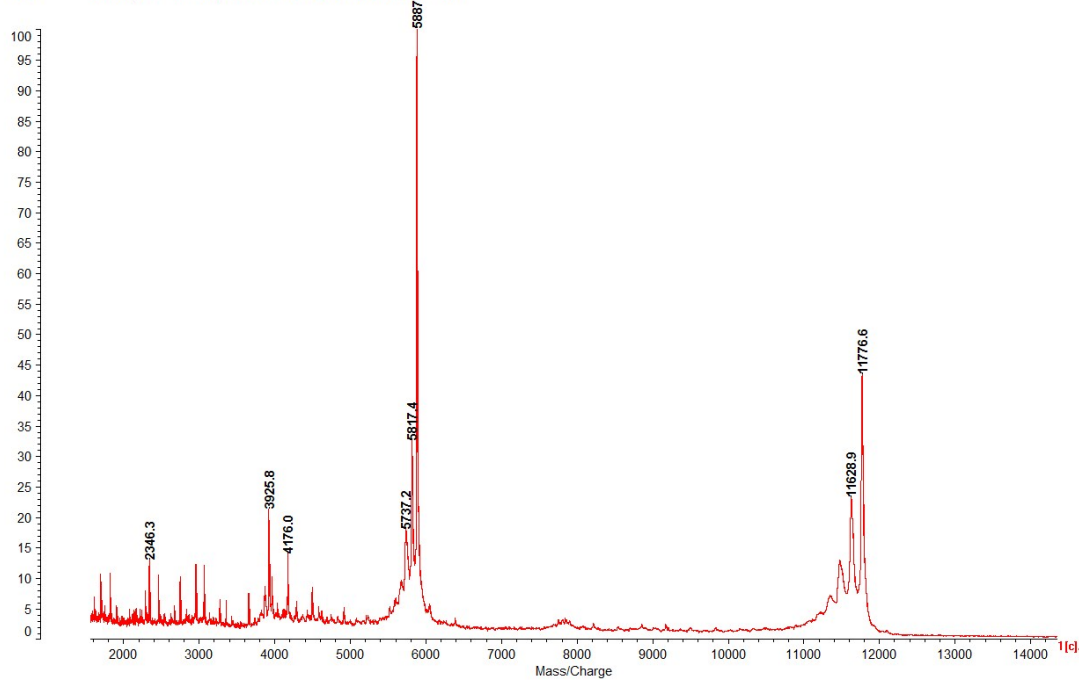

Figure S4. MALDI-TOF-MS of biotin labeled GBI-10-3CD

Data: G-8TL0001.J12 22 Nov 2013 17:36 Cal: tof 22 Nov 2013 17:29  
Kratos PC Axima CFRplus V2.4.0: Mode Linear, Power: 95, Blanked, P.Ext. @ 11777 (bin 148)  
%Int. 8.6 mV[sum= 4012 mV] Profiles 1-466 Smooth Av 60 -Baseline 80

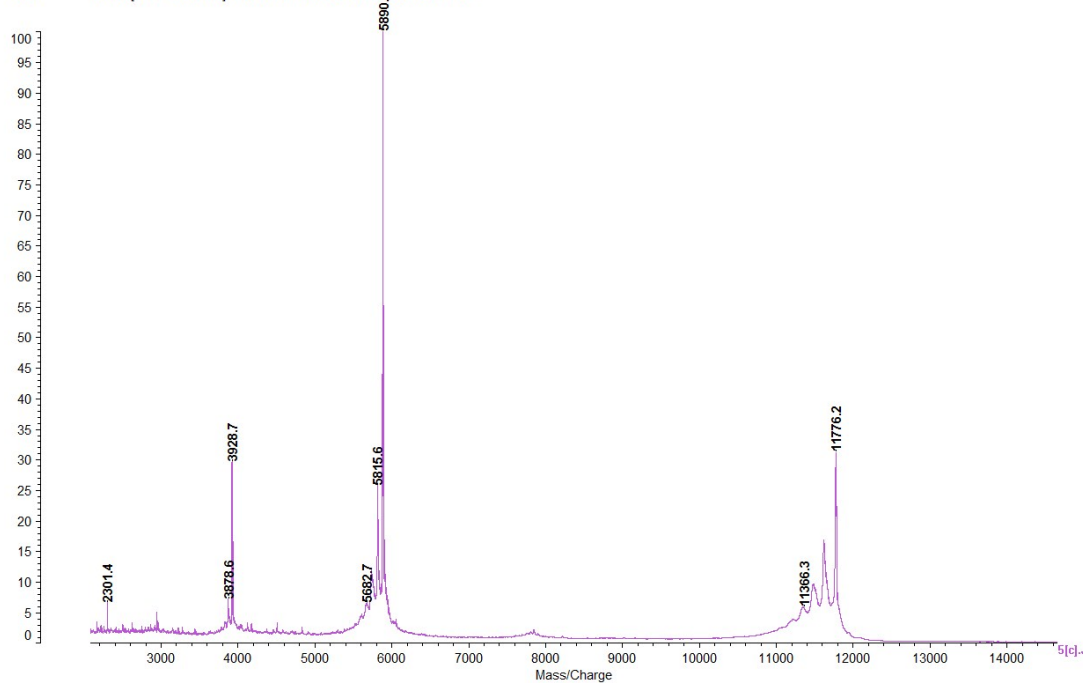

Figure S5. MALDI-TOF-MS of biotin labeled GBI-10-10A<sub>L</sub>

Data: G-18TL0001.J8 22 Nov 2013 17:23 Cal: tof 22 Nov 2013 17:22  
Kratos PC Axima CFRplus V2.4.0: Mode Linear, Power: 95, Blanked, P.Ext. @ 11777 (bin 148)  
%Int. 10 mV[sum= 1400 mV] Profiles 1-135 Smooth Av 60 -Baseline 80

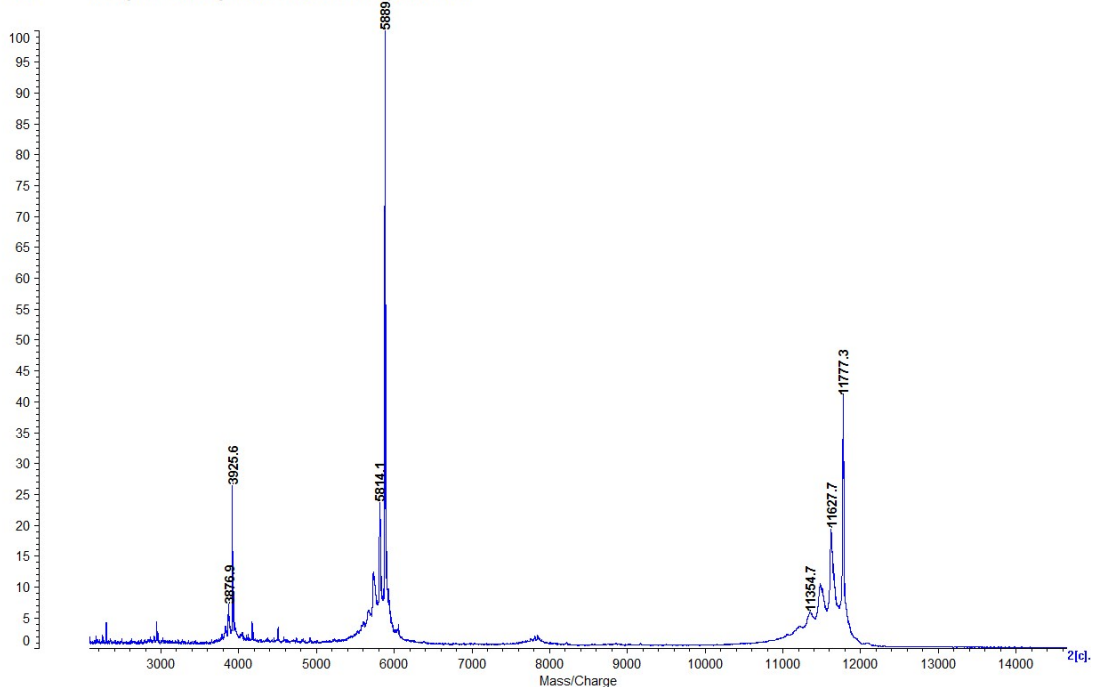

Figure S6. MALDI-TOF-MS of biotin labeled GBI-10-18A<sub>L</sub>

Data: G-19TD0001.J9 22 Nov 2013 17:25 Cal: tof 22 Nov 2013 17:22  
Kratos PC Axima CFRplus V2.4.0: Mode Linear, Power: 95, Blanked, P.Ext. @ 11777 (bin 148)  
%Int. 9.9 mV[sum= 1071 mV] Profiles 39-146 Smooth Av=50 -Baseline 80

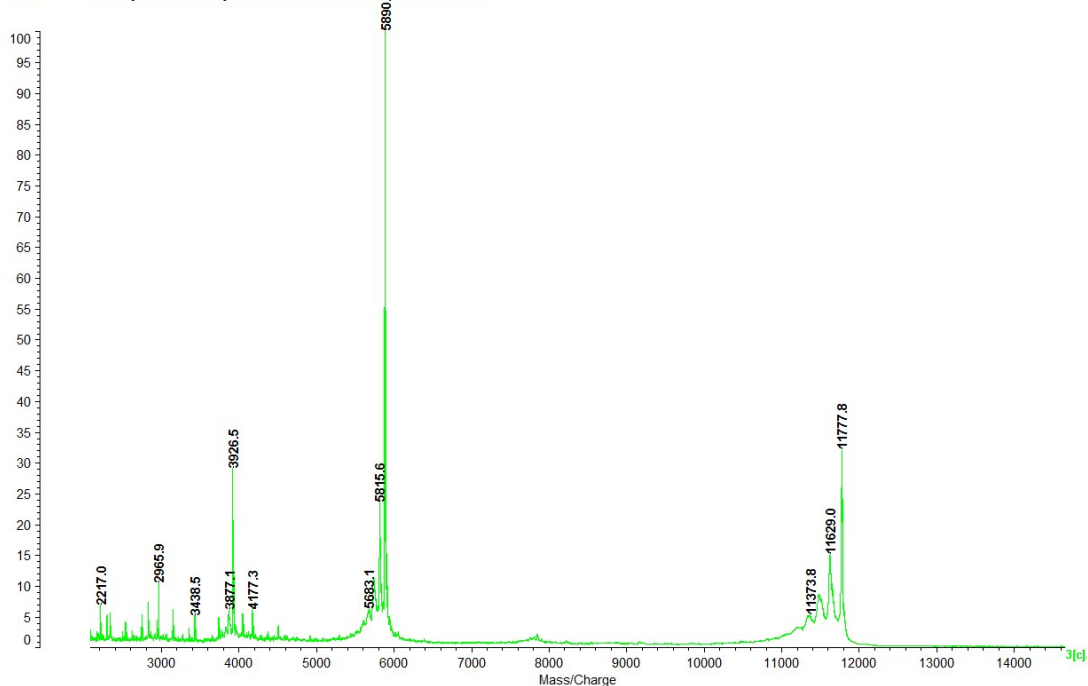

Figure S7. MALDI-TOF-MS of biotin labeled GBI-10-21T<sub>D</sub>

Data: G-20TL0001.J10 22 Nov 2013 17:30 Cal: tof 22 Nov 2013 17:29  
Kratos PC Axima CFRplus V2.4.0: Mode Linear, Power: 95, Blanked, P.Ext. @ 11777 (bin 148)  
%Int. 7.8 mV[sum= 1132 mV] Profiles 1-145 Smooth Av=50 -Baseline 80

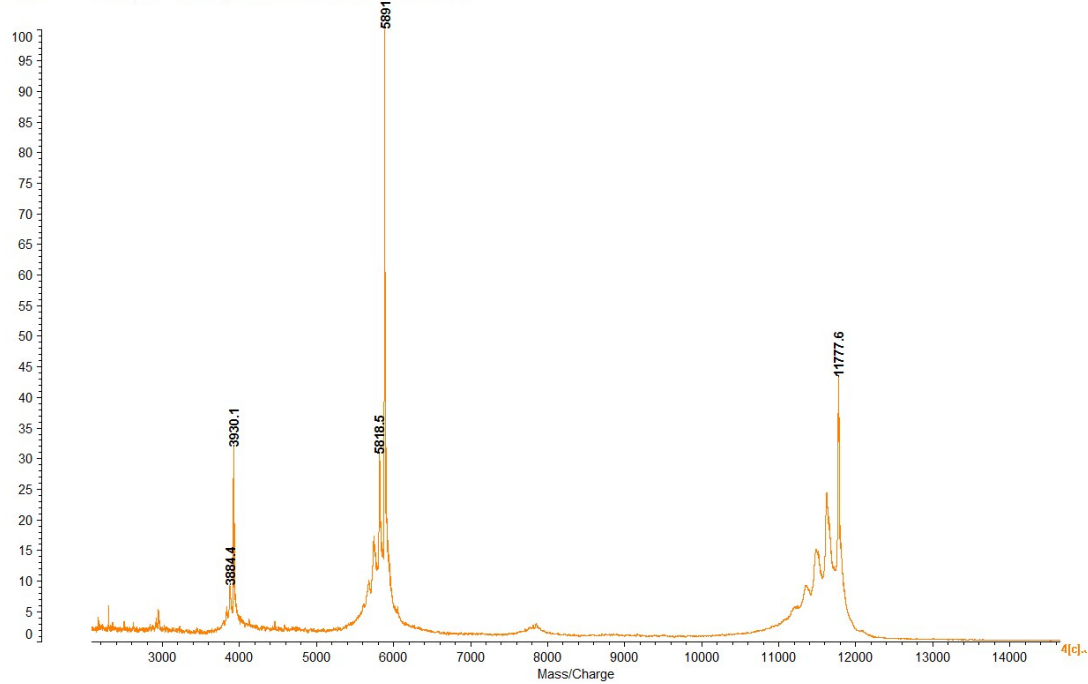

Figure S8. MALDI-TOF-MS of biotin labeled GBI-10-23C<sub>L</sub>

Data: 22AD0002.D1 13 Dec 2013 15:53 Cal: ZHONG-INS 13 Dec 2013 15:49  
Kratos PC Axima CFRplus V2.4.0. Mode Linear, Power: 92, Blanked, P.Ext. @ 11777 (bin 148)  
%Int. 4.9 mV[sum= 1075 mV] Profiles 1-219 Smooth Av -Baseline 80

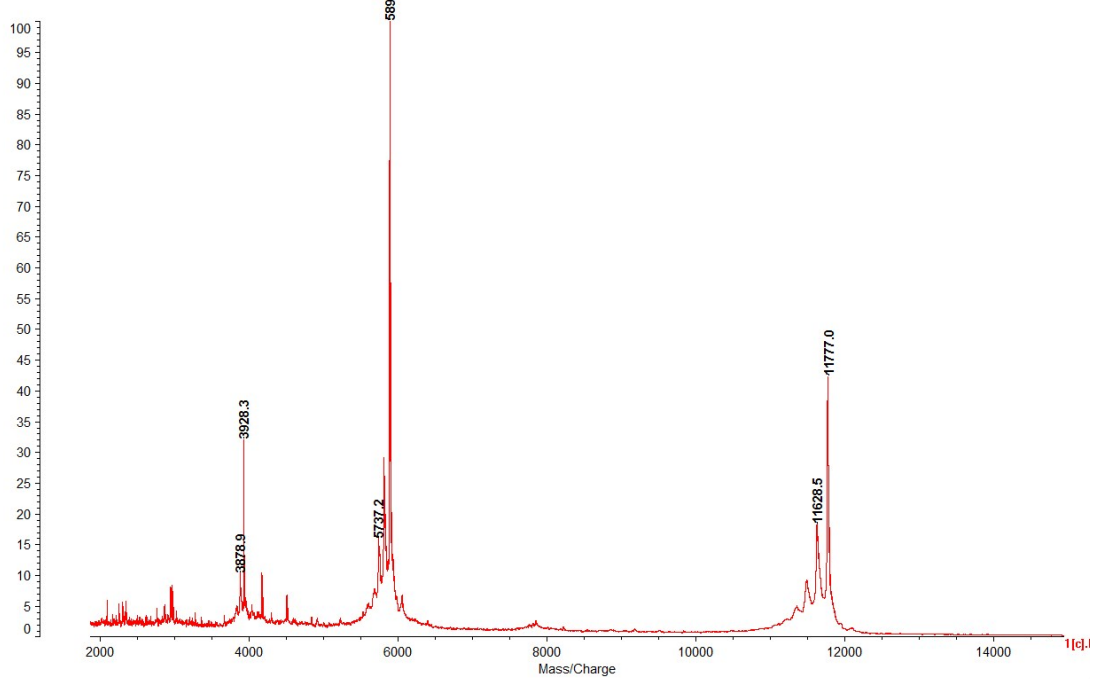

Figure S9. MALDI-TOF-MS of biotin labeled GBI-10-22T<sub>D</sub>

Data: 31AL0002.D2 13 Dec 2013 15:57 Cal: ZHONG-INS 13 Dec 2013 15:56  
Kratos PC Axima CFRplus V2.4.0. Mode Linear, Power: 92, Blanked, P.Ext. @ 11777 (bin 148)  
%Int. 4.0 mV[sum= 1288 mV] Profiles 52-371 Smooth Av -Baseline 80

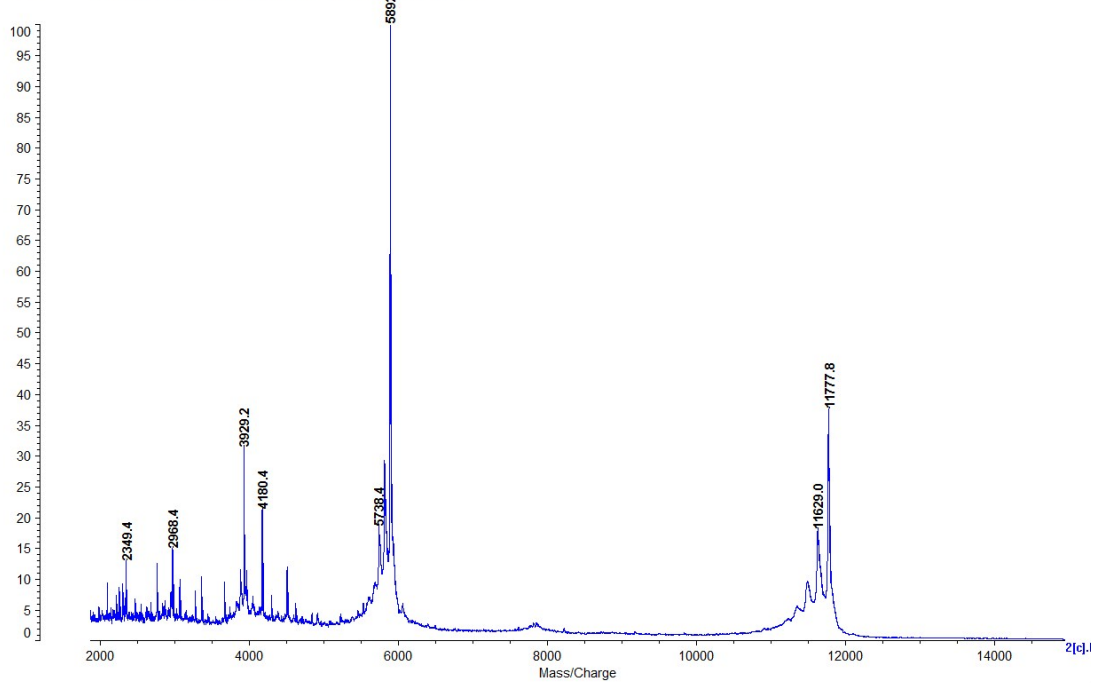

Figure S10. MALDI-TOF-MS of biotin labeled GBI-10-33C<sub>L</sub>

Data: BIO-G-off0003.A8 21 Oct 2013 16:30 Cal: zhong-MIX 21 Oct 2013 16:30  
Kratos PC Axima CFRplus V2.4.0: Mode Linear, Power: 94, Blanked, P.Ext. @ 11777 (bin 148)  
%Int. 3.8 mV[sum= 643 mV] Profiles 1-170 Smooth Av 5 Baseline 80

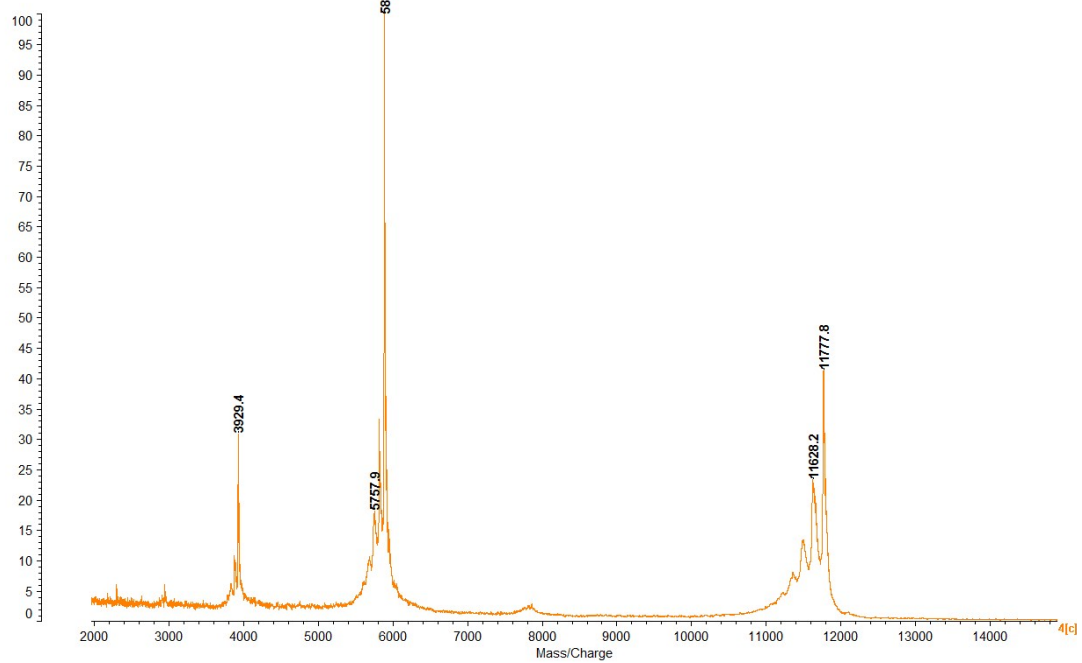

Figure S11. MALDI-TOF-MS of biotin labeled GBI-10-26T<sub>L</sub>/32T<sub>L</sub>

Data: BIO-G-off0004.B12 22 Oct 2013 15:20 Cal: zhong-MIX 22 Oct 2013 15:20  
Kratos PC Axima CFRplus V2.4.0: Mode Linear, Power: 98, Blanked, P.Ext. @ 11777 (bin 148)  
%Int. 2.9 mV[sum= 903 mV] Profiles 1-315 Smooth Av 5 Baseline 80

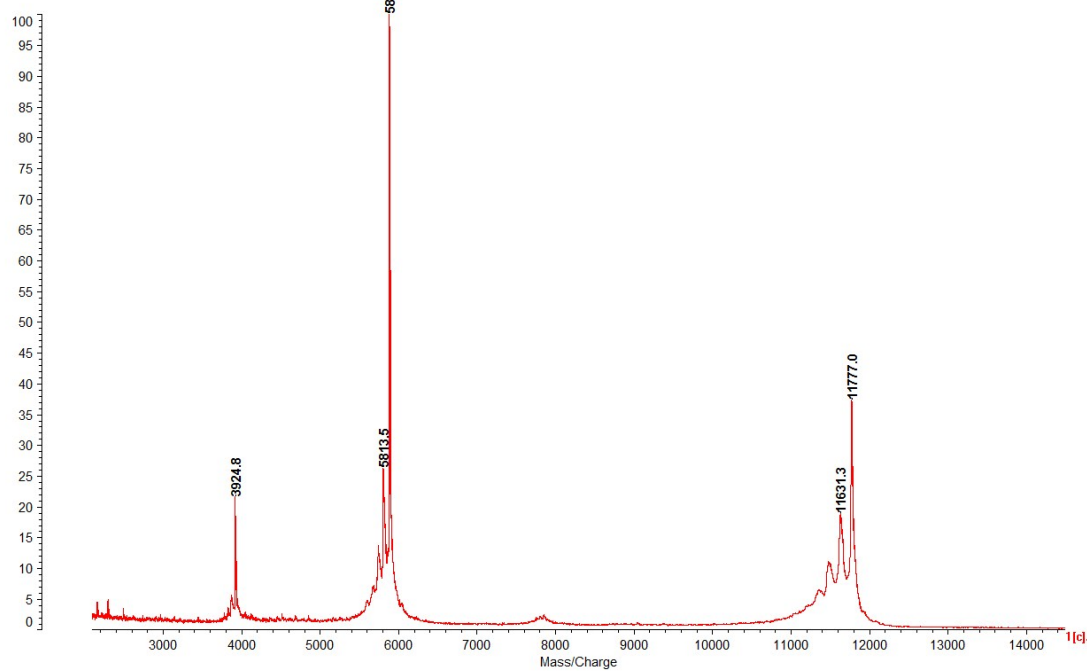

Figure S12. MALDI-TOF-MS of biotin labeled GBI-10-4A<sub>L</sub>/26T<sub>L</sub>/32T<sub>L</sub>



**Table S1.** Biotin labeled GBI-10 and 2'-dI, D-/L-isoNA modified variants

| No. | Name                          | Sequence(5'-3')                                                                    | MALDI-TOF-MS [M+H] <sup>+</sup> |       |
|-----|-------------------------------|------------------------------------------------------------------------------------|---------------------------------|-------|
|     |                               |                                                                                    | Calcd                           | Found |
| 1   | <b>GBI-10</b>                 | 5'-biotin-TTT CCCAGAGGGAAGACTTTAGGTTCCGGTTCACGTCC-3'                               | 11777                           | 11773 |
| 2   | <b>GBI-10-1dI</b>             | 5'-biotin-TTT <b>dI</b> CCAGAGGGAAGACTTTAGGTTCCGGTTCACGTCC-3'                      | 11787                           | 11787 |
| 3   | <b>GBI-10-2dI</b>             | 5'-biotin-TTT <b>dI</b> CAGAGGGAAGACTTTAGGTTCCGGTTCACGTCC-3'                       | 11787                           | 11787 |
| 4   | <b>GBI-10-3dI</b>             | 5'-biotin-TTT <b>CCdI</b> AGAGGGAAGACTTTAGGTTCCGGTTCACGTCC-3'                      | 11787                           | 11787 |
| 5   | <b>GBI-10-4dI</b>             | 5'-biotin-TTT <b>CCCdI</b> GAGGGAAGACTTTAGGTTCCGGTTCACGTCC-3'                      | 11787                           | 11787 |
| 6   | <b>GBI-10-6dI</b>             | 5'-biotin-TTT <b>CCCAGdI</b> GGGAAGACTTTAGGTTCCGGTTCACGTCC-3'                      | 11787                           | 11787 |
| 7   | <b>GBI-10-10dI</b>            | 5'-biotin-TTT <b>CCCAGAGGGdI</b> AGACTTTAGGTTCCGGTTCACGTCC-3'                      | 11787                           | 11787 |
| 8   | <b>GBI-10-11dI</b>            | 5'-biotin-TTT <b>CCCAGAGGGAdI</b> GACTTTAGGTTCCGGTTCACGTCC-3'                      | 11787                           | 11787 |
| 9   | <b>GBI-10-13dI</b>            | 5'-biotin-TTT <b>CCCAGAGGGAGdI</b> CTTTAGGTTCCGGTTCACGTCC-3'                       | 11787                           | 11787 |
| 10  | <b>GBI-10-14dI</b>            | 5'-biotin-TTT <b>CCCAGAGGGAAGAdI</b> CTTAGGTTCCGGTTCACGTCC-3'                      | 11787                           | 11787 |
| 11  | <b>GBI-10-15dI</b>            | 5'-biotin-TTT <b>CCCAGAGGGAAGACdI</b> TTAGGTTCCGGTTCACGTCC-3'                      | 11787                           | 11787 |
| 12  | <b>GBI-10-16dI</b>            | 5'-biotin-TTT <b>CCCAGAGGGAAGACTTAdI</b> TAGGTTCCGGTTCACGTCC-3'                    | 11787                           | 11787 |
| 13  | <b>GBI-10-17dI</b>            | 5'-biotin-TTT <b>CCCAGAGGGAAGACTTAdI</b> AGGTTCCGGTTCACGTCC-3'                     | 11787                           | 11787 |
| 14  | <b>GBI-10-18dI</b>            | 5'-biotin-TTT <b>CCCAGAGGGAAGACTTTAdI</b> GGTTCGGTTCACGTCC-3'                      | 11787                           | 11787 |
| 15  | <b>GBI-10-21dI</b>            | 5'-biotin-TTT <b>CCCAGAGGGAAGACTTTAGGdI</b> TCCGGTTCACGTCC-3'                      | 11787                           | 11787 |
| 16  | <b>GBI-10-22dI</b>            | 5'-biotin-TTT <b>CCCAGAGGGAAGACTTTAGGTdI</b> CCGGTTCACGTCC-3'                      | 11787                           | 11787 |
| 17  | <b>GBI-10-23dI</b>            | 5'-biotin-TTT <b>CCCAGAGGGAAGACTTTAGGTTdI</b> GGTTCACGTCC-3'                       | 11787                           | 11787 |
| 18  | <b>GBI-10-26dI</b>            | 5'-biotin-TTT <b>CCCAGAGGGAAGACTTTAGGTTCCGGdI</b> TCCACGTCC-3'                     | 11787                           | 11787 |
| 19  | <b>GBI-10-27dI</b>            | 5'-biotin-TTT <b>CCCAGAGGGAAGACTTTAGGTTCCGGTAdI</b> CACGTCC-3'                     | 11787                           | 11787 |
| 20  | <b>GBI-10-28dI</b>            | 5'-biotin-TTT <b>CCCAGAGGGAAGACTTTAGGTTCCGGTAdI</b> ACGTCC-3'                      | 11787                           | 11787 |
| 21  | <b>GBI-10-29dI</b>            | 5'-biotin-TTT <b>CCCAGAGGGAAGACTTTAGGTTCCGGTTCdI</b> CGTCC-3'                      | 11787                           | 11787 |
| 22  | <b>GBI-10-30dI</b>            | 5'-biotin-TTT <b>CCCAGAGGGAAGACTTTAGGTTCCGGTTCAdI</b> GTCC-3'                      | 11787                           | 11787 |
| 23  | <b>GBI-10-32dI</b>            | 5'-biotin-TTT <b>CCCAGAGGGAAGACTTTAGGTTCCGGTTCACGdI</b> CC-3'                      | 11787                           | 11787 |
| 24  | <b>GBI-10-33dI</b>            | 5'-biotin-TTT <b>CCCAGAGGGAAGACTTTAGGTTCCGGTTCACGTAdI</b> C-3'                     | 11787                           | 11787 |
| 25  | <b>GBI-10-34dI</b>            | 5'-biotin-TTT <b>CCCAGAGGGAAGACTTTAGGTTCCGGTTCACGTAdI</b> -3'                      | 11787                           | 11787 |
| 26  | <b>GBI-10-1C<sub>D</sub></b>  | 5'-biotin-TTT <b>C<sub>D</sub></b> CCAGAGGGAAGACTTTAGGTTCCGGTTCACGTCC-3'           | 11777                           | 11777 |
| 27  | <b>GBI-10-2C<sub>D</sub></b>  | 5'-biotin-TTT <b>CC<sub>D</sub></b> CAGAGGGAAGACTTTAGGTTCCGGTTCACGTCC-3'           | 11777                           | 11777 |
| 28  | <b>GBI-10-3C<sub>D</sub></b>  | 5'-biotin-TTT <b>CCC<sub>D</sub></b> AGAGGGAAGACTTTAGGTTCCGGTTCACGTCC-3'           | 11777                           | 11777 |
| 29  | <b>GBI-10-14C<sub>D</sub></b> | 5'-biotin-TTT <b>CCCAGAGGGAAGAC<sub>D</sub></b> TTTAGGTTCCGGTTCACGTCC-3'           | 11777                           | 11777 |
| 30  | <b>GBI-10-23C<sub>D</sub></b> | 5'-biotin-TTT <b>CCCAGAGGGAAGACTTTAGGTT<sub>D</sub></b> GGTTCACGTCC-3'             | 11777                           | 11777 |
| 31  | <b>GBI-10-28C<sub>D</sub></b> | 5'-biotin-TTT <b>CCCAGAGGGAAGACTTTAGGTTCCGGTT<sub>D</sub></b> ACGTCC-3'            | 11777                           | 11777 |
| 32  | <b>GBI-10-30C<sub>D</sub></b> | 5'-biotin-TTT <b>CCCAGAGGGAAGACTTTAGGTTCCGGTTCA<sub>D</sub></b> GTCC-3'            | 11777                           | 11777 |
| 33  | <b>GBI-10-33C<sub>D</sub></b> | 5'-biotin-TTT <b>CCCAGAGGGAAGACTTTAGGTTCCGGTTCA<sub>D</sub>GT<sub>D</sub></b> C-3' | 11777                           | 11777 |
| 34  | <b>GBI-10-34C<sub>D</sub></b> | 5'-biotin-TTT <b>CCCAGAGGGAAGACTTTAGGTTCCGGTTCA<sub>D</sub>GT<sub>D</sub></b> -3'  | 11777                           | 11777 |
| 35  | <b>GBI-10-1C<sub>L</sub></b>  | 5'-biotin-TTT <b>C<sub>L</sub></b> CCAGAGGGAAGACTTTAGGTTCCGGTTCACGTCC-3'           | 11777                           | 11777 |
| 36  | <b>GBI-10-2C<sub>L</sub></b>  | 5'-biotin-TTT <b>CC<sub>L</sub></b> CAGAGGGAAGACTTTAGGTTCCGGTTCACGTCC-3'           | 11777                           | 11777 |
| 37  | <b>GBI-10-3C<sub>L</sub></b>  | 5'-biotin-TTT <b>CCC<sub>L</sub></b> AGAGGGAAGACTTTAGGTTCCGGTTCACGTCC-3'           | 11777                           | 11777 |
| 38  | <b>GBI-10-14C<sub>L</sub></b> | 5'-biotin-TTT <b>CCCAGAGGGAAGAC<sub>L</sub></b> TTTAGGTTCCGGTTCACGTCC-3'           | 11777                           | 11777 |
| 39  | <b>GBI-10-23C<sub>L</sub></b> | 5'-biotin-TTT <b>CCCAGAGGGAAGACTTTAGGTT<sub>L</sub></b> GGTTCACGTCC-3'             | 11777                           | 11777 |
| 40  | <b>GBI-10-28C<sub>L</sub></b> | 5'-biotin-TTT <b>CCCAGAGGGAAGACTTTAGGTTCCGGTT<sub>L</sub></b> ACGTCC-3'            | 11777                           | 11777 |
| 41  | <b>GBI-10-30C<sub>L</sub></b> | 5'-biotin-TTT <b>CCCAGAGGGAAGACTTTAGGTTCCGGTTCA<sub>L</sub></b> GTCC-3'            | 11777                           | 11777 |
| 42  | <b>GBI-10-33C<sub>L</sub></b> | 5'-biotin-TTT <b>CCCAGAGGGAAGACTTTAGGTTCCGGTTCA<sub>L</sub>GT<sub>L</sub></b> C-3' | 11777                           | 11777 |
| 43  | <b>GBI-10-34C<sub>L</sub></b> | 5'-biotin-TTT <b>CCCAGAGGGAAGACTTTAGGTTCCGGTTCA<sub>L</sub>GT<sub>L</sub></b> -3'  | 11777                           | 11777 |
| 44  | <b>GBI-10-4A<sub>D</sub></b>  | 5'-biotin-TTT <b>CCCA<sub>D</sub></b> GAGGGAAGACTTTAGGTTCCGGTTCACGTCC-3'           | 11777                           | 11777 |
| 45  | <b>GBI-10-6A<sub>D</sub></b>  | 5'-biotin-TTT <b>CCCAGA<sub>D</sub></b> GGGAAGACTTTAGGTTCCGGTTCACGTCC-3'           | 11777                           | 11777 |
| 46  | <b>GBI-10-10A<sub>D</sub></b> | 5'-biotin-TTT <b>CCCAGAGGGA<sub>D</sub></b> AGACTTTAGGTTCCGGTTCACGTCC-3'           | 11777                           | 11777 |
| 47  | <b>GBI-10-11A<sub>D</sub></b> | 5'-biotin-TTT <b>CCCAGAGGGA<sub>D</sub></b> GACTTTAGGTTCCGGTTCACGTCC-3'            | 11777                           | 11777 |
| 48  | <b>GBI-10-13A<sub>D</sub></b> | 5'-biotin-TTT <b>CCCAGAGGGAAGA<sub>D</sub></b> CTTTAGGTTCCGGTTCACGTCC-3'           | 11777                           | 11777 |
| 49  | <b>GBI-10-18A<sub>D</sub></b> | 5'-biotin-TTT <b>CCCAGAGGGAAGACTTTA<sub>D</sub></b> GGTTCGGTTCACGTCC-3'            | 11777                           | 11777 |
| 50  | <b>GBI-10-29A<sub>D</sub></b> | 5'-biotin-TTT <b>CCCAGAGGGAAGACTTTAGGTTCCGGTTCA<sub>D</sub></b> CGTCC-3'           | 11777                           | 11777 |
| 51  | <b>GBI-10-4A<sub>L</sub></b>  | 5'-biotin-TTT <b>CCCA<sub>L</sub></b> GAGGGAAGACTTTAGGTTCCGGTTCACGTCC-3'           | 11777                           | 11777 |
| 52  | <b>GBI-10-6A<sub>L</sub></b>  | 5'-biotin-TTT <b>CCCAGA<sub>L</sub></b> GGGAAGACTTTAGGTTCCGGTTCACGTCC-3'           | 11777                           | 11777 |
| 53  | <b>GBI-10-10A<sub>L</sub></b> | 5'-biotin-TTT <b>CCCAGAGGGA<sub>L</sub></b> AGACTTTAGGTTCCGGTTCACGTCC-3'           | 11777                           | 11777 |
| 54  | <b>GBI-10-11A<sub>L</sub></b> | 5'-biotin-TTT <b>CCCAGAGGGA<sub>L</sub></b> GACTTTAGGTTCCGGTTCACGTCC-3'            | 11777                           | 11777 |
| 55  | <b>GBI-10-13A<sub>L</sub></b> | 5'-biotin-TTT <b>CCCAGAGGGAAGA<sub>L</sub></b> CTTTAGGTTCCGGTTCACGTCC-3'           | 11777                           | 11777 |
| 56  | <b>GBI-10-18A<sub>L</sub></b> | 5'-biotin-TTT <b>CCCAGAGGGAAGACTTTA<sub>L</sub></b> GGTTCGGTTCACGTCC-3'            | 11777                           | 11777 |
| 57  | <b>GBI-10-29A<sub>L</sub></b> | 5'-biotin-TTT <b>CCCAGAGGGAAGACTTTAGGTTCCGGTTCA<sub>L</sub></b> CGTCC-3'           | 11777                           | 11777 |
| 58  | <b>GBI-10-15T<sub>D</sub></b> | 5'-biotin-TTT <b>CCCAGAGGGAAGACT<sub>D</sub></b> TTAGGTTCCGGTTCACGTCC-3'           | 11777                           | 11777 |
| 59  | <b>GBI-10-16T<sub>D</sub></b> | 5'-biotin-TTT <b>CCCAGAGGGAAGACT<sub>D</sub></b> TAGGTTCCGGTTCACGTCC-3'            | 11777                           | 11777 |
| 60  | <b>GBI-10-17T<sub>D</sub></b> | 5'-biotin-TTT <b>CCCAGAGGGAAGACT<sub>D</sub></b> AGGTTCCGGTTCACGTCC-3'             | 11777                           | 11777 |
| 61  | <b>GBI-10-21T<sub>D</sub></b> | 5'-biotin-TTT <b>CCCAGAGGGAAGACT<sub>D</sub></b> TAGGTTCCGGTTCACGTCC-3'            | 11777                           | 11777 |

|    |                                                                       |                                                                                                             |       |       |
|----|-----------------------------------------------------------------------|-------------------------------------------------------------------------------------------------------------|-------|-------|
| 62 | <b>GBI-10-22T<sub>D</sub></b>                                         | 5'-biotin-TTT CCCAGAGGGAAGACTTTAGGTT <sub>D</sub> CGGTTACGTCC-3'                                            | 11777 | 11777 |
| 63 | <b>GBI-10-26T<sub>D</sub></b>                                         | 5'-biotin-TTT CCCAGAGGGAAGACTTTAGGTTCCGGT <sub>D</sub> TCACGTCC-3'                                          | 11777 | 11777 |
| 64 | <b>GBI-10-27T<sub>D</sub></b>                                         | 5'-biotin-TTT CCCAGAGGGAAGACTTTAGGTTCCGGT <sub>D</sub> CACGTCC-3'                                           | 11777 | 11777 |
| 65 | <b>GBI-10-32T<sub>D</sub></b>                                         | 5'-biotin-TTT CCCAGAGGGAAGACTTTAGGTTCCGGT <sub>D</sub> CACGT <sub>D</sub> CC-3'                             | 11777 | 11777 |
| 66 | <b>GBI-10-15T<sub>L</sub></b>                                         | 5'-biotin-TTT CCCAGAGGGAAGACTTTAGGTTCCGGTTCACGTCC-3'                                                        | 11777 | 11777 |
| 67 | <b>GBI-10-16T<sub>L</sub></b>                                         | 5'-biotin-TTT CCCAGAGGGAAGACTTT <sub>L</sub> TAGGTTCCGGTTCACGTCC-3'                                         | 11777 | 11777 |
| 68 | <b>GBI-10-17T<sub>L</sub></b>                                         | 5'-biotin-TTT CCCAGAGGGAAGACTTT <sub>L</sub> AGGTTCCGGTTCACGTCC-3'                                          | 11777 | 11777 |
| 69 | <b>GBI-10-21T<sub>L</sub></b>                                         | 5'-biotin-TTT CCCAGAGGGAAGACTTTAGGT <sub>L</sub> TCGGTTCACGTCC-3'                                           | 11777 | 11777 |
| 70 | <b>GBI-10-22T<sub>L</sub></b>                                         | 5'-biotin-TTT CCCAGAGGGAAGACTTTAGGT <sub>L</sub> CGGTTACGTCC-3'                                             | 11777 | 11777 |
| 71 | <b>GBI-10-26T<sub>L</sub></b>                                         | 5'-biotin-TTT CCCAGAGGGAAGACTTTAGGTTCCGGT <sub>L</sub> TCACGTCC-3'                                          | 11777 | 11777 |
| 72 | <b>GBI-10-27T<sub>L</sub></b>                                         | 5'-biotin-TTT CCCAGAGGGAAGACTTTAGGTTCCGGT <sub>L</sub> CACGTCC-3'                                           | 11777 | 11777 |
| 73 | <b>GBI-10-32T<sub>L</sub></b>                                         | 5'-biotin-TTT CCCAGAGGGAAGACTTTAGGTTCCGGTTCACGT <sub>L</sub> CC-3'                                          | 11777 | 11777 |
| 74 | <b>18A<sub>L</sub>/26T<sub>L</sub></b>                                | 5'-biotin-TTT CCCAGAGGGAAGACTTTA <sub>L</sub> GGTTCGGT <sub>L</sub> TCACGTCC-3'                             | 11777 | 11777 |
| 75 | <b>18A<sub>L</sub>/32T<sub>L</sub></b>                                | 5'-biotin-TTT CCCAGAGGGAAGACTTTA <sub>L</sub> GGTTCGGTTCACGT <sub>L</sub> CC-3'                             | 11777 | 11777 |
| 76 | <b>26T<sub>L</sub>/32T<sub>L</sub></b>                                | 5'-biotin-TTT CCCAGAGGGAAGACTTTAGGTTCCGGT <sub>L</sub> TCACGT <sub>L</sub> CC-3'                            | 11777 | 11777 |
| 77 | <b>21T<sub>D</sub>/26T<sub>L</sub>/32T<sub>L</sub></b>                | 5'-biotin-TTT CCCAGAGGGAAGACTTTAGGT <sub>D</sub> TCGGT <sub>L</sub> TCACGT <sub>L</sub> CC-3'               | 11777 | 11777 |
| 78 | <b>4A<sub>L</sub>/26T<sub>L</sub>/32T<sub>L</sub></b>                 | 5'-biotin-TTT CCCA <sub>L</sub> GAGGGAAGACTTTAGGTTCCGGT <sub>L</sub> TCACGT <sub>L</sub> CC-3'              | 11777 | 11777 |
| 79 | <b>4A<sub>L</sub>/18A<sub>L</sub>/26T<sub>L</sub></b>                 | 5'-biotin-TTT CCCA <sub>L</sub> GAGGGAAGACTTTA <sub>L</sub> GGTTCGGT <sub>L</sub> TCACGTCC-3'               | 11777 | 11777 |
| 80 | <b>4A<sub>L</sub>/18A<sub>L</sub>/26T<sub>L</sub>/32T<sub>L</sub></b> | 5'-biotin-TTT CCCA <sub>L</sub> GAGGGAAGACTTTA <sub>L</sub> GGTTCGGT <sub>L</sub> TCACGT <sub>L</sub> CC-3' | 11777 | 11777 |
| 81 | <b>18A<sub>L</sub>/26T<sub>L</sub>/32T<sub>L</sub></b>                | 5'-biotin-TTT CCCAGAGGGAAGACTTTA <sub>L</sub> GGTTCGGT <sub>L</sub> TCACGT <sub>L</sub> CC-3'               | 11777 | 11777 |
| 82 | <b>18A<sub>L</sub>/26T<sub>L</sub>/32T<sub>D</sub></b>                | 5'-biotin-TTT CCCAGAGGGAAGACTTTA <sub>L</sub> GGTTCGGT <sub>L</sub> TCACGT <sub>D</sub> CC-3'               | 11777 | 11777 |
| 83 | <b>18A<sub>L</sub>/26T<sub>L</sub>/32dI</b>                           | 5'-biotin-TTT CCCAGAGGGAAGACTTTA <sub>L</sub> GGTTCGGT <sub>L</sub> TCACGdICC-3'                            | 11787 | 11787 |
| 84 | <b>11A<sub>L</sub>/26T<sub>L</sub>/32T<sub>L</sub></b>                | 5'-biotin-TTT CCCAGAGGGA <sub>A</sub> LACTTTAGGTTCCGGT <sub>L</sub> TCACGT <sub>L</sub> CC-3'               | 11777 | 11777 |
| 85 | <b>15T<sub>L</sub>/26T<sub>L</sub>/32T<sub>L</sub></b>                | 5'-biotin-TTT CCCAGAGGGAAGACTTTAGGTTCCGGT <sub>L</sub> TCACGT <sub>L</sub> CC-3'                            | 11777 | 11777 |
